# Supplementary material
Source: PubMed Central journal article supplement (PMC1180749)

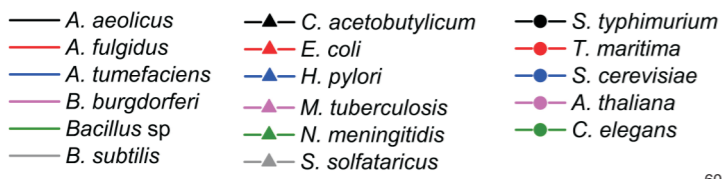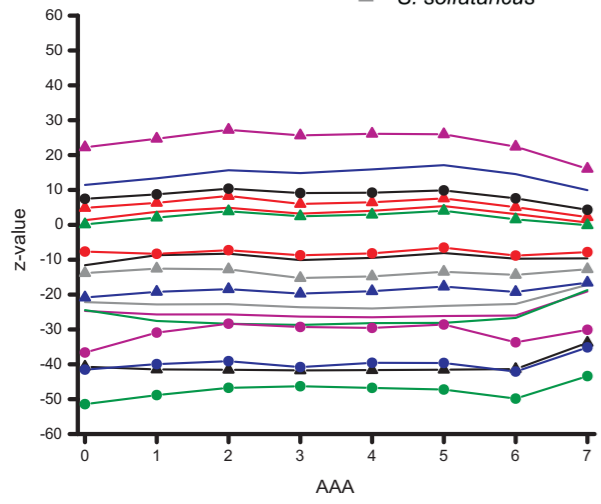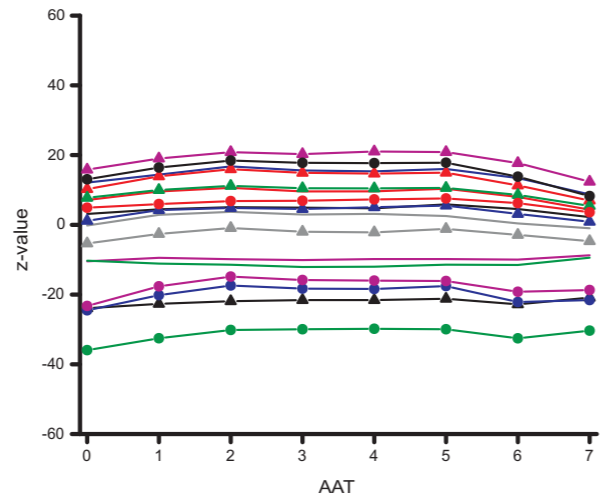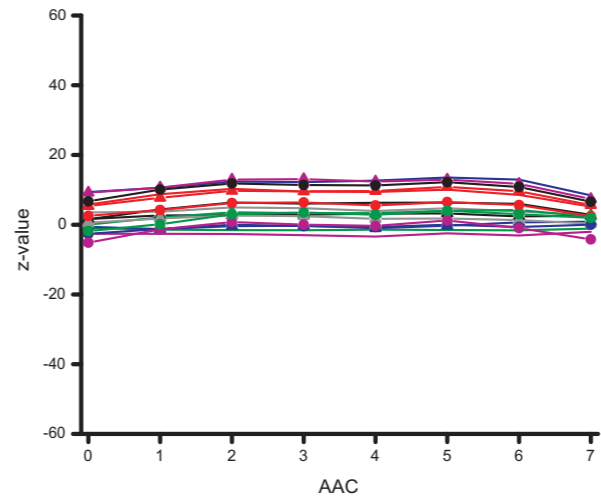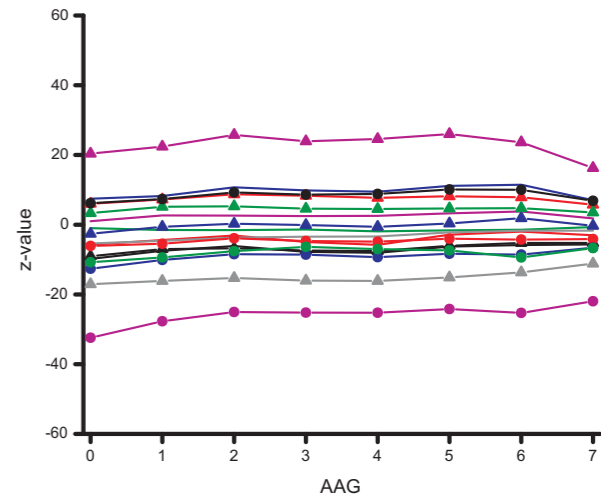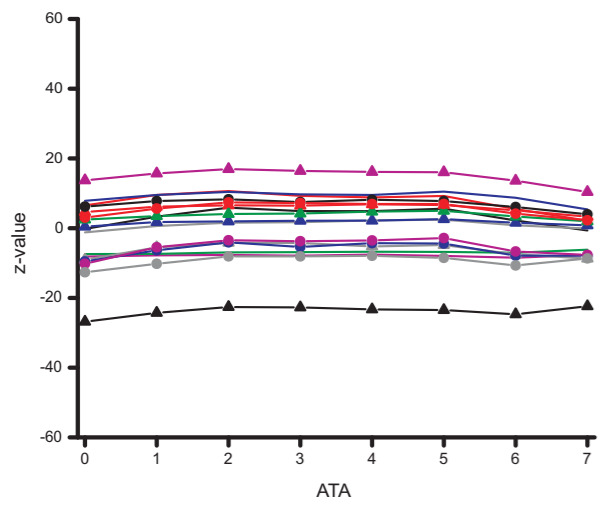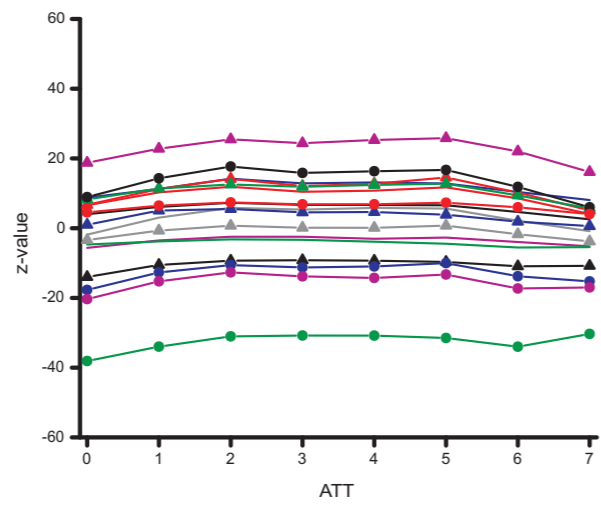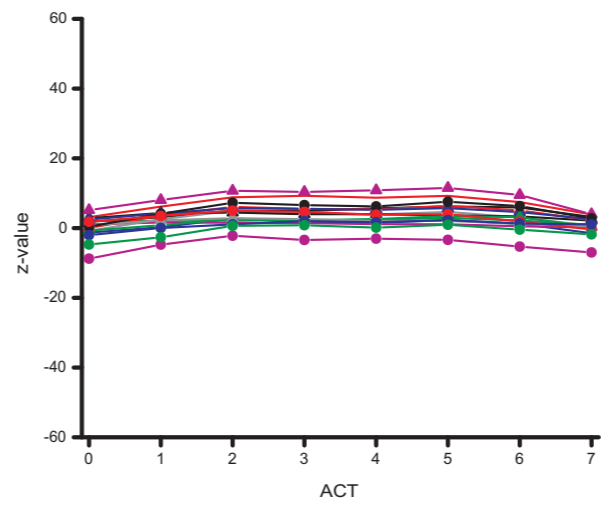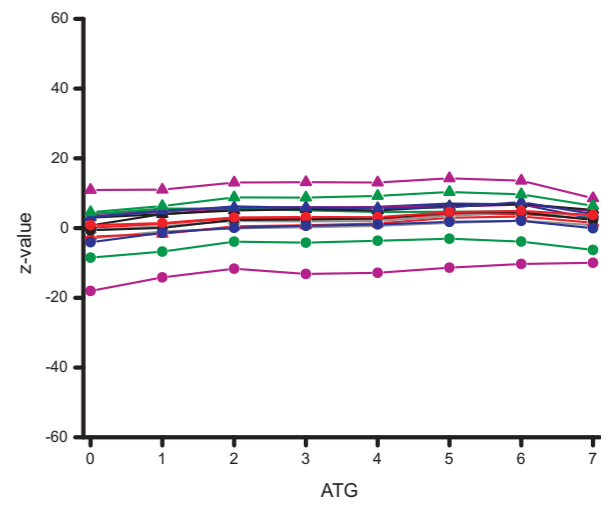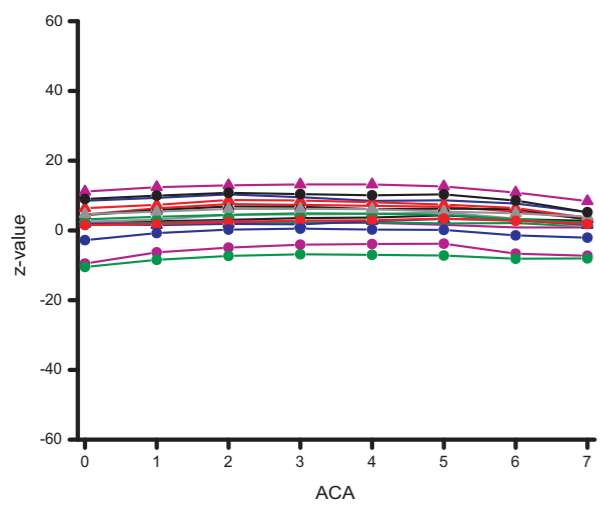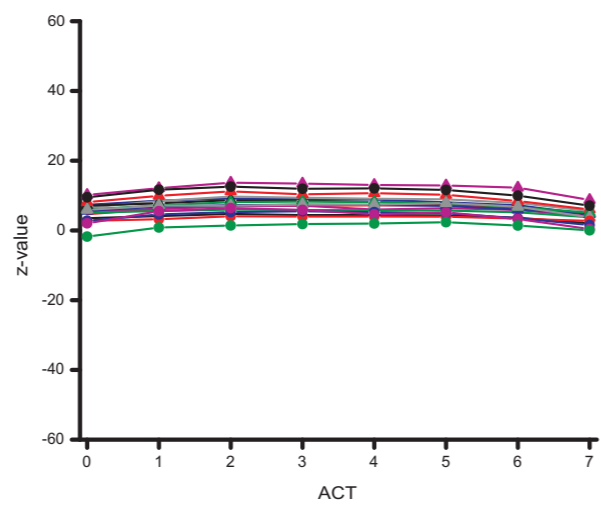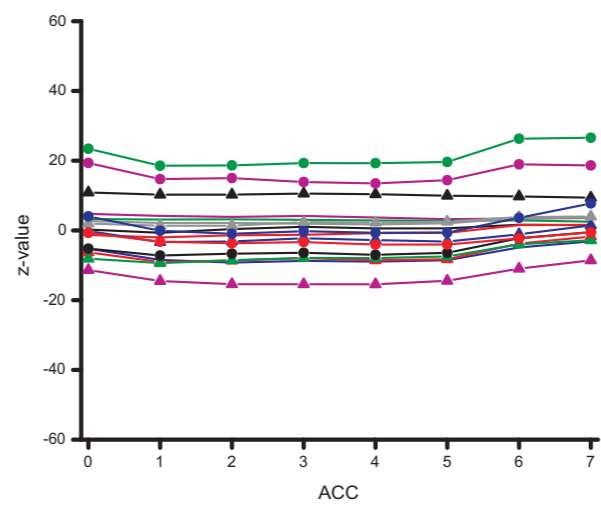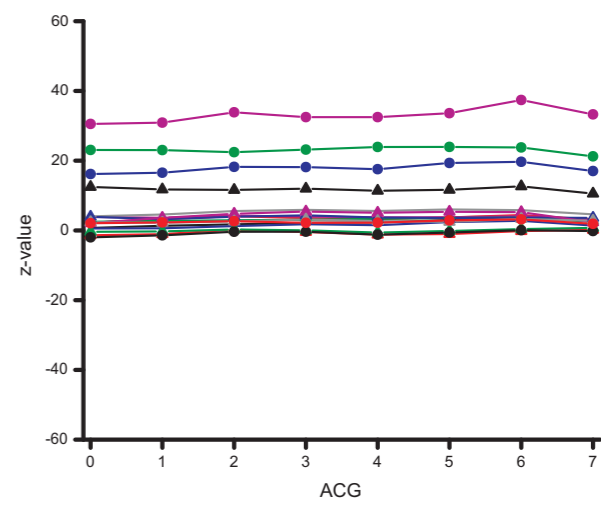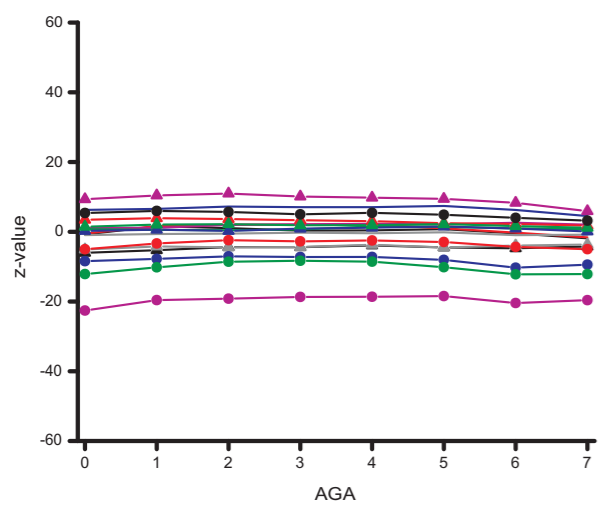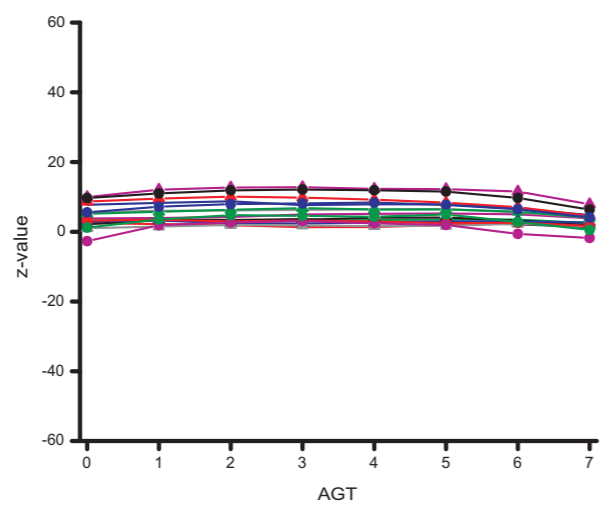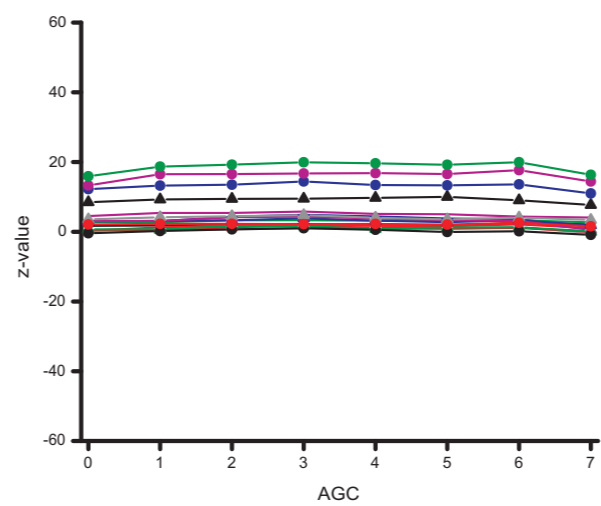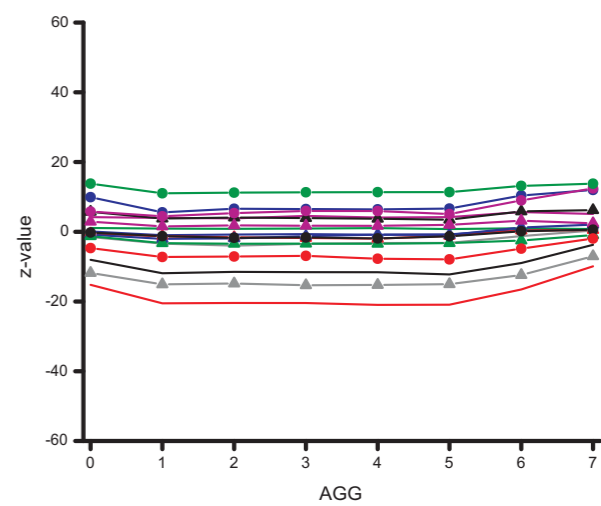

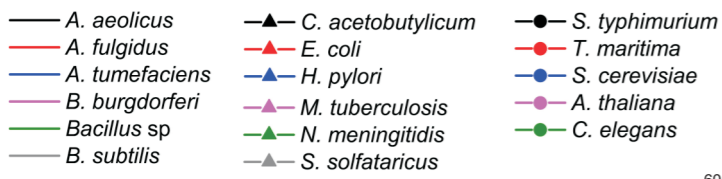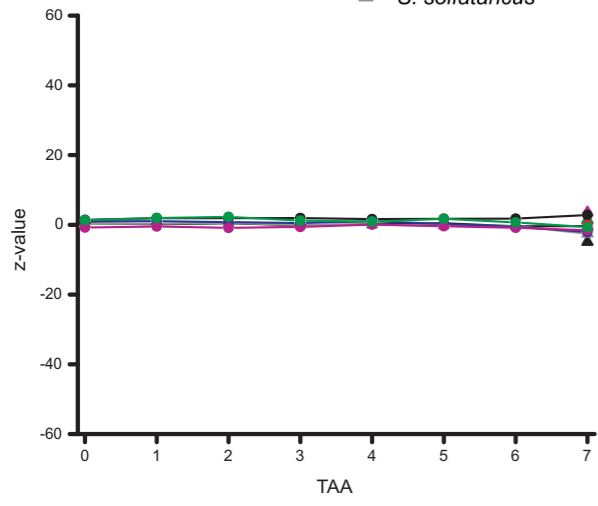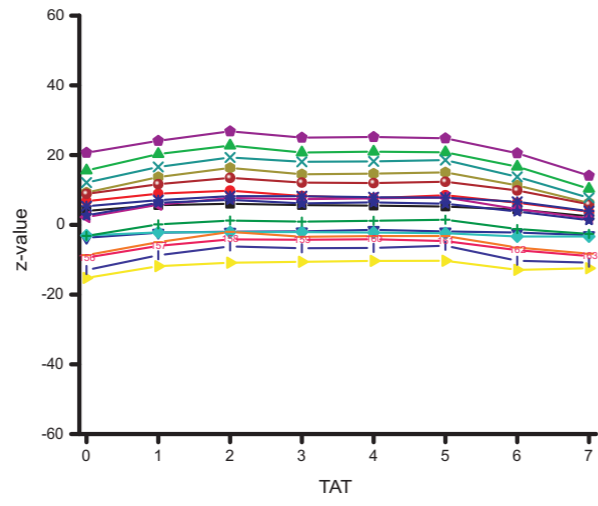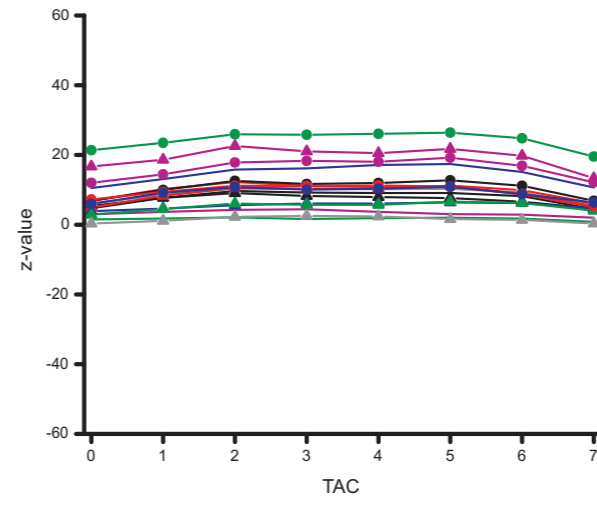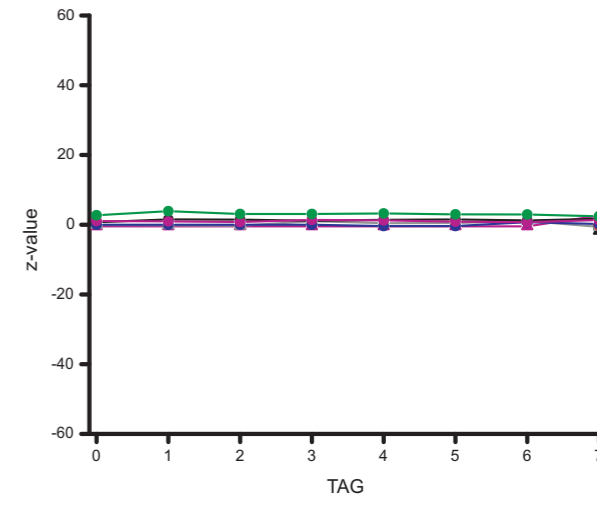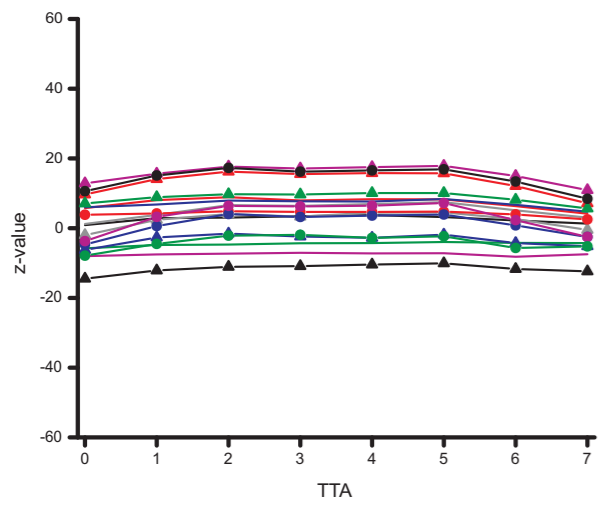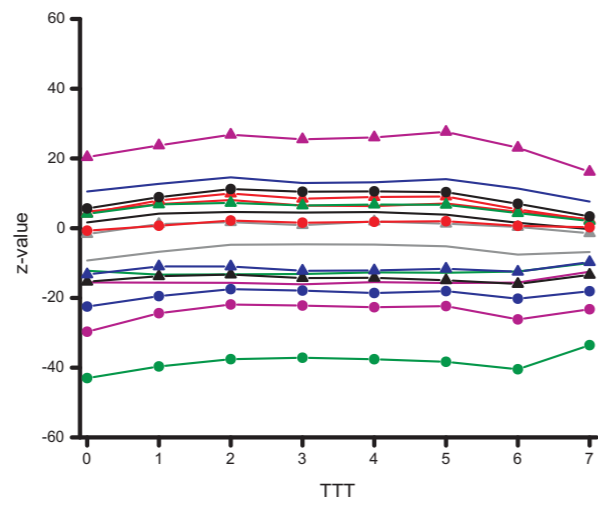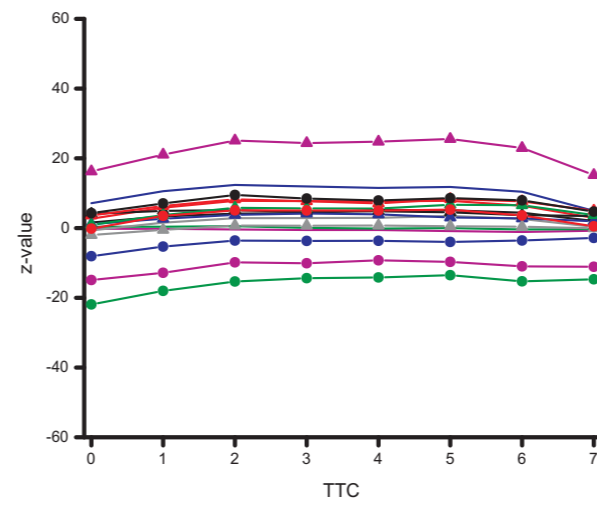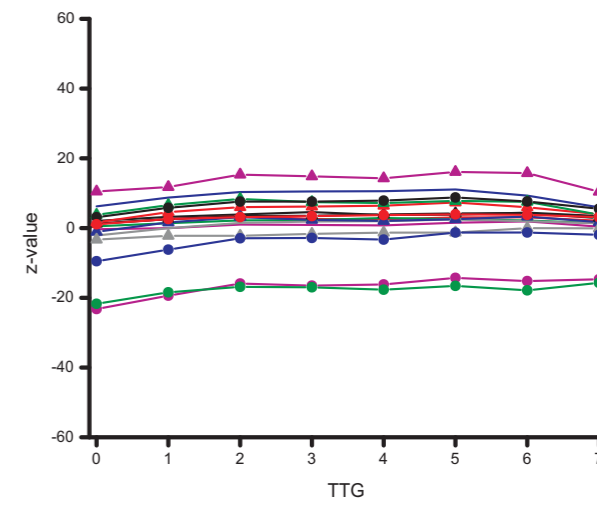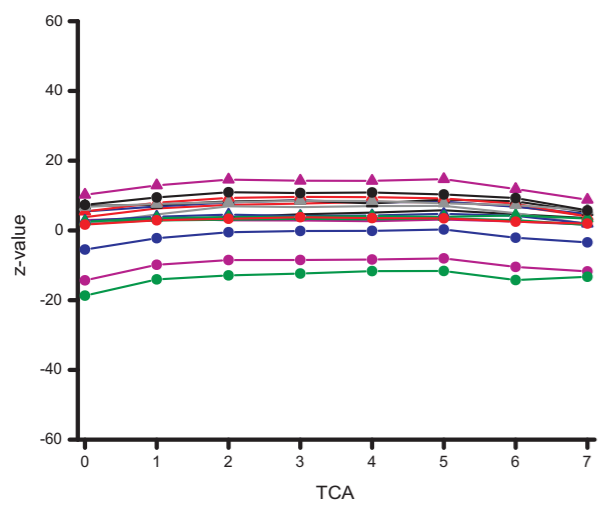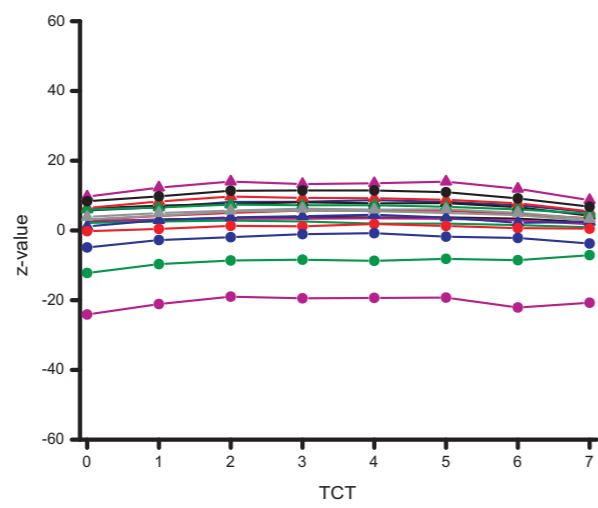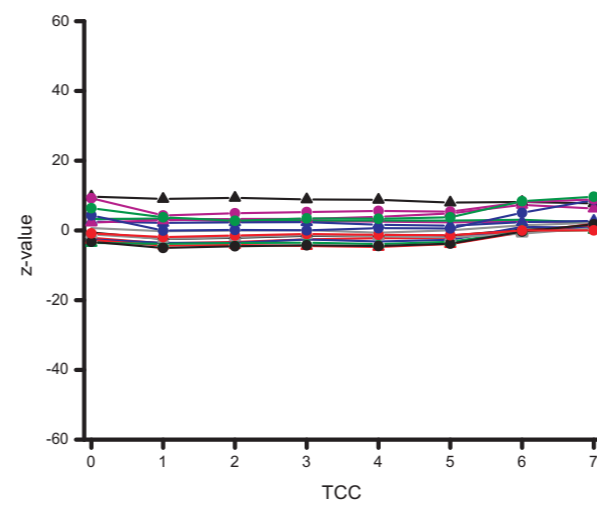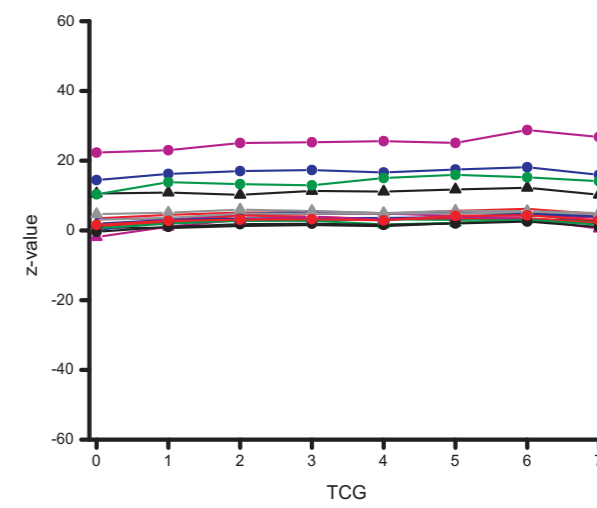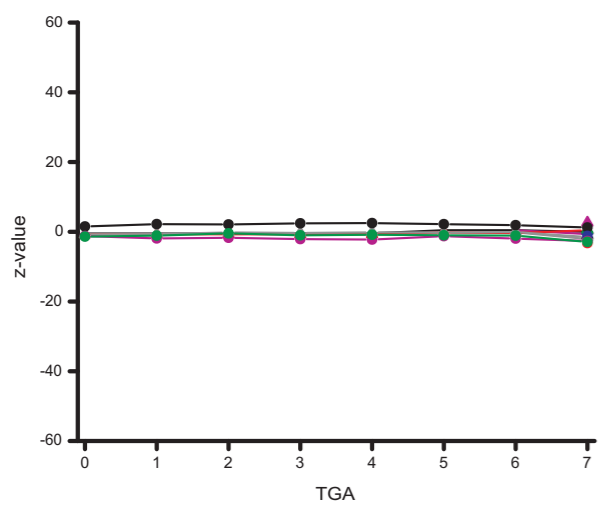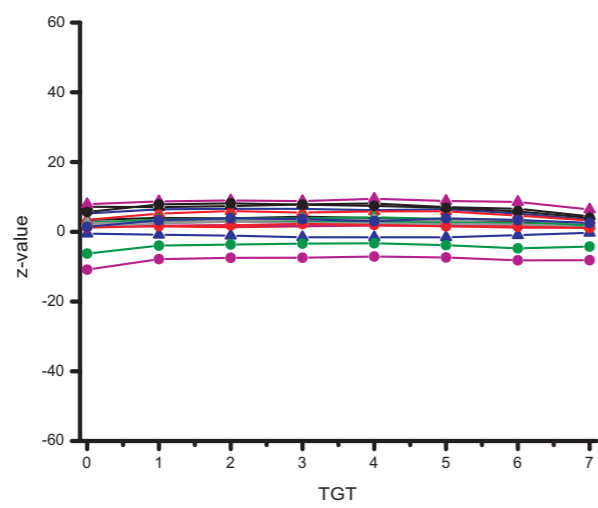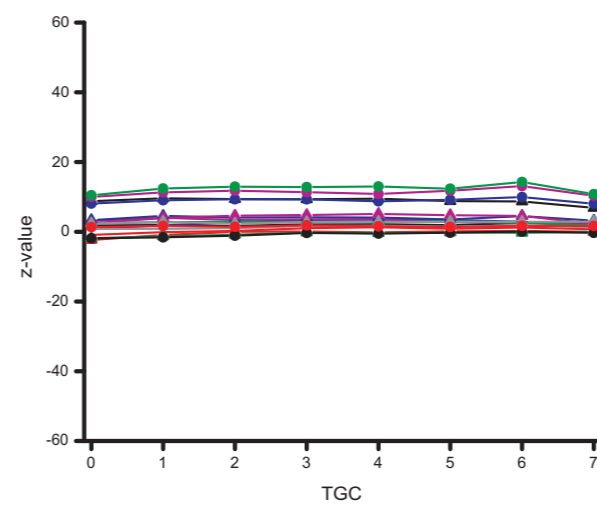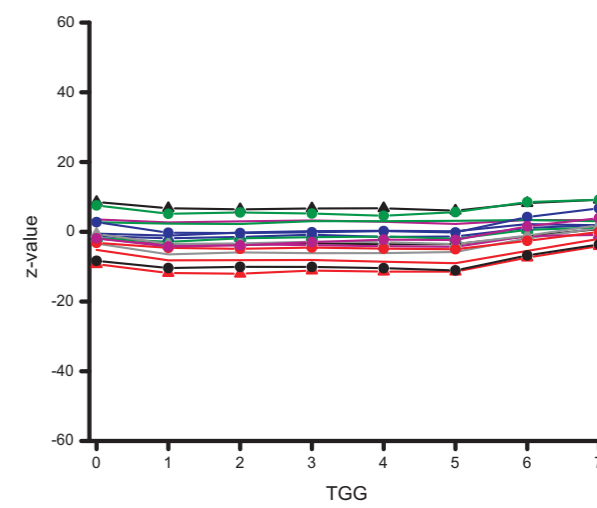

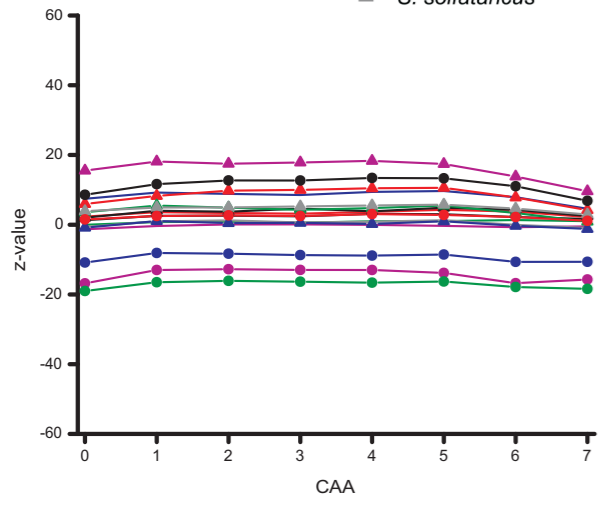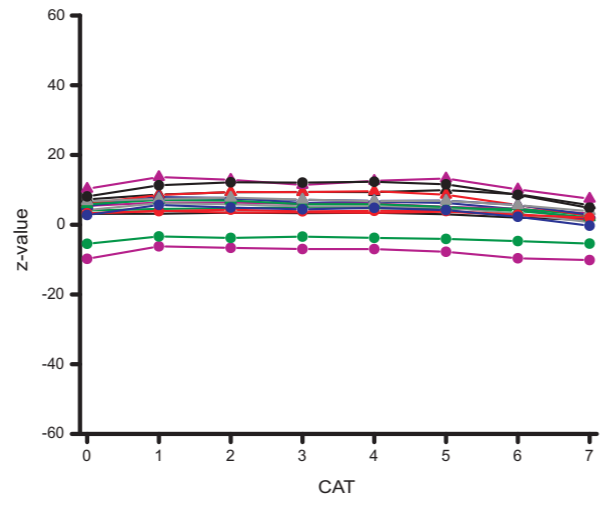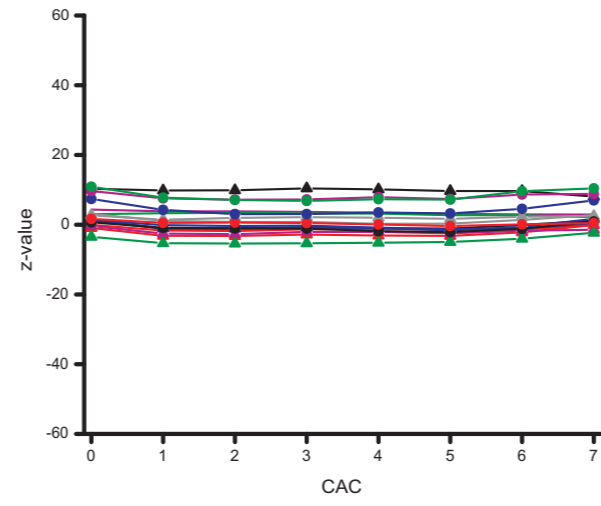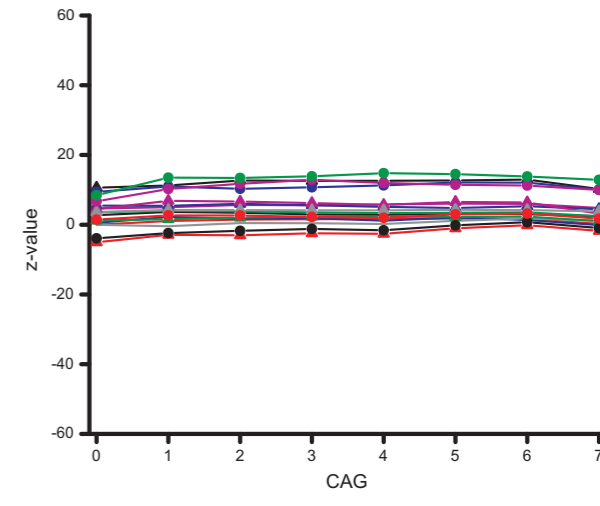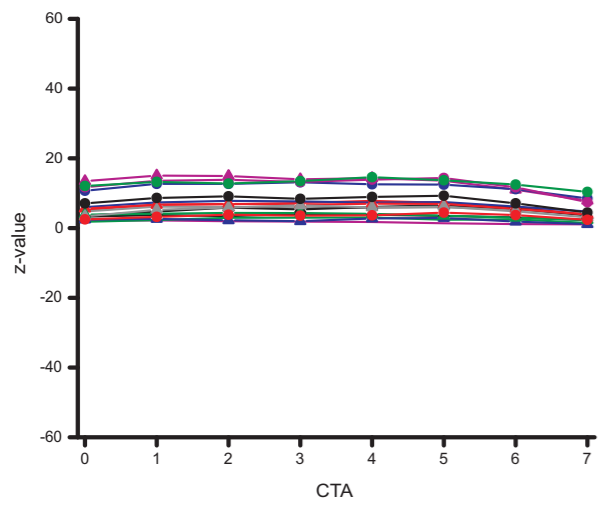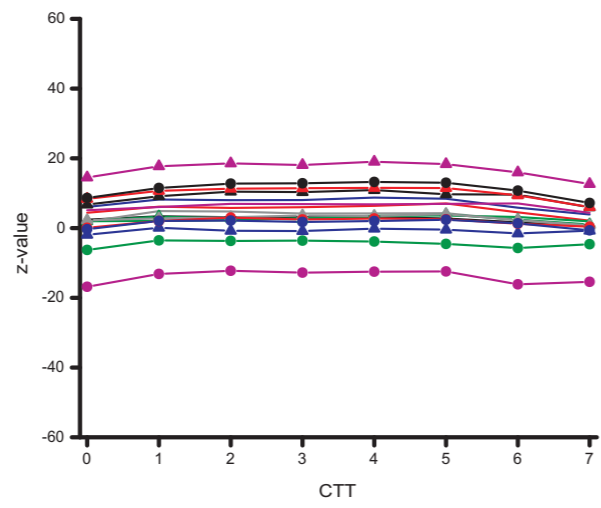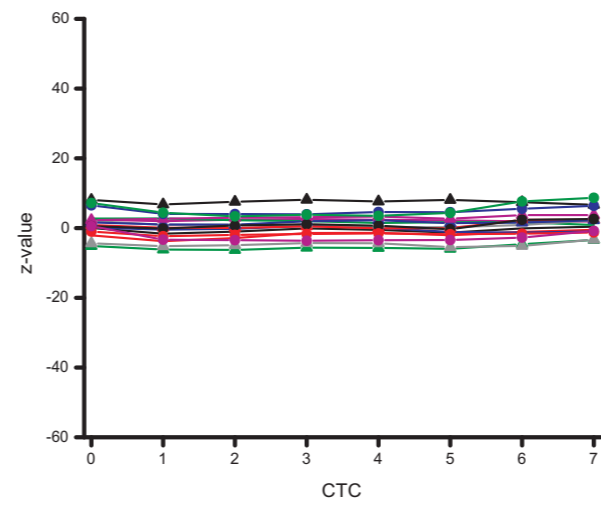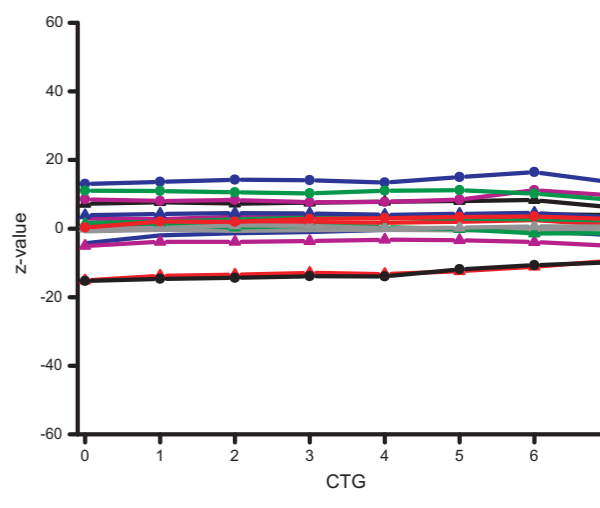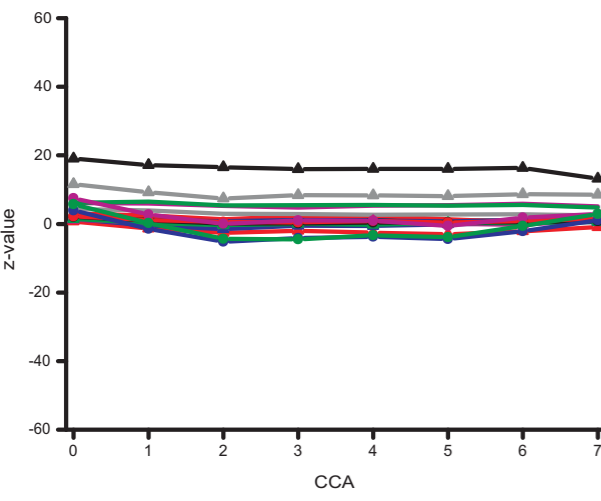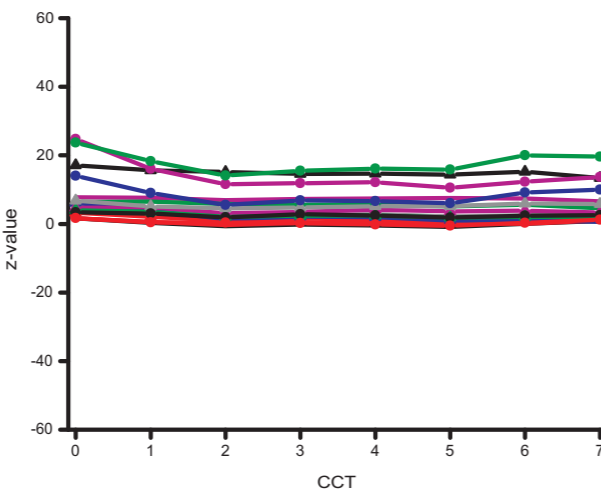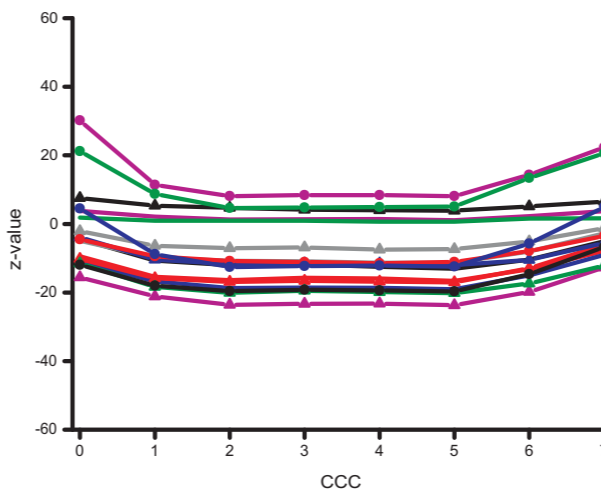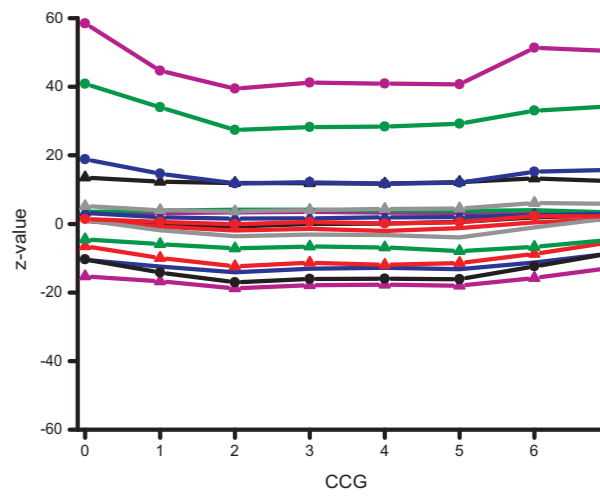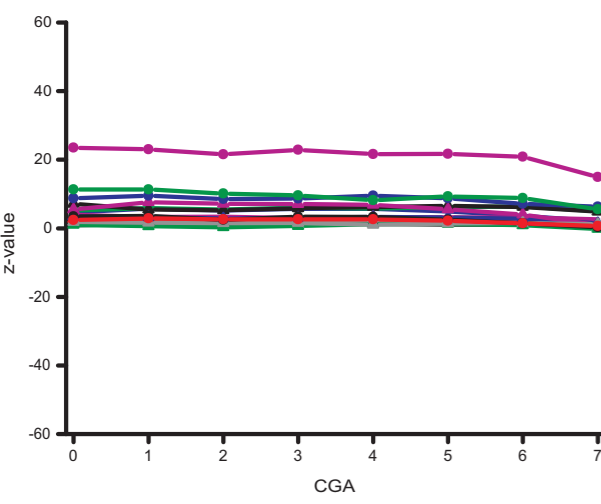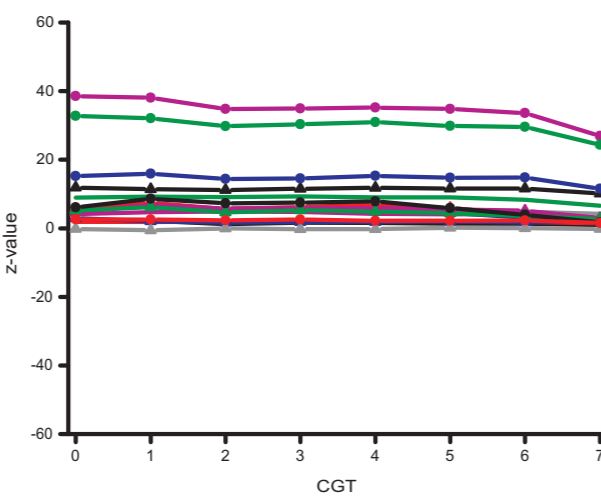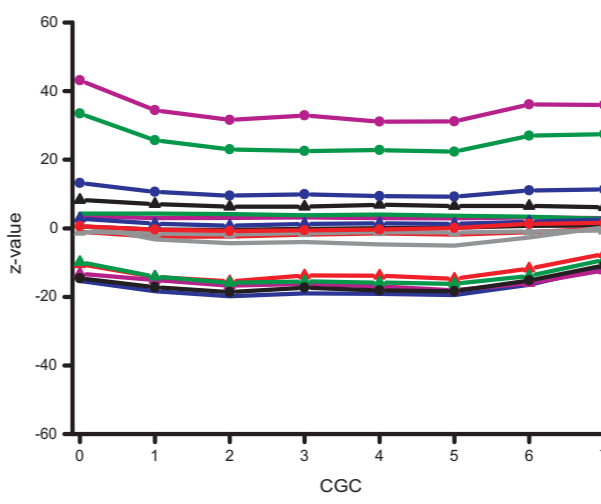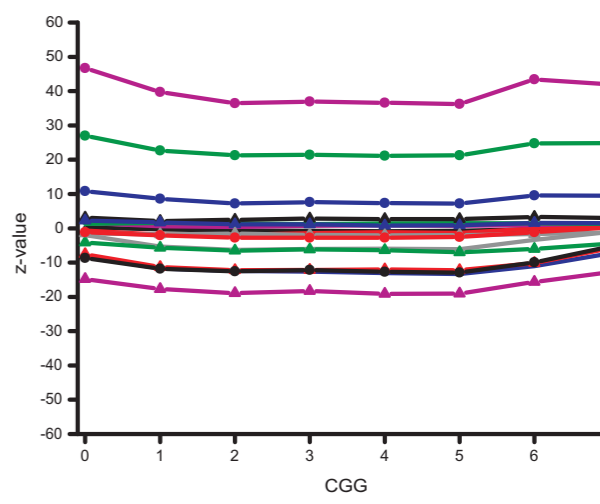

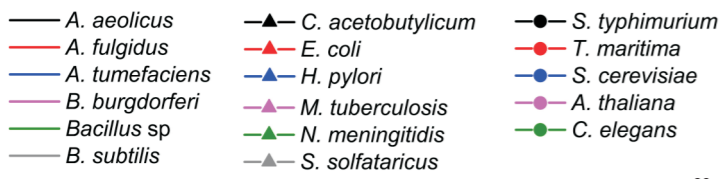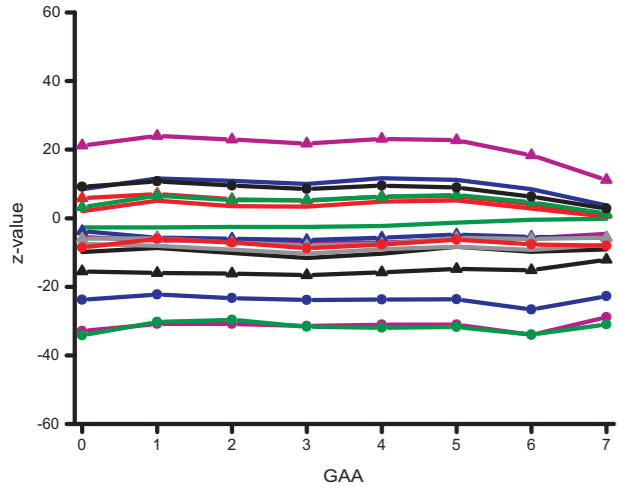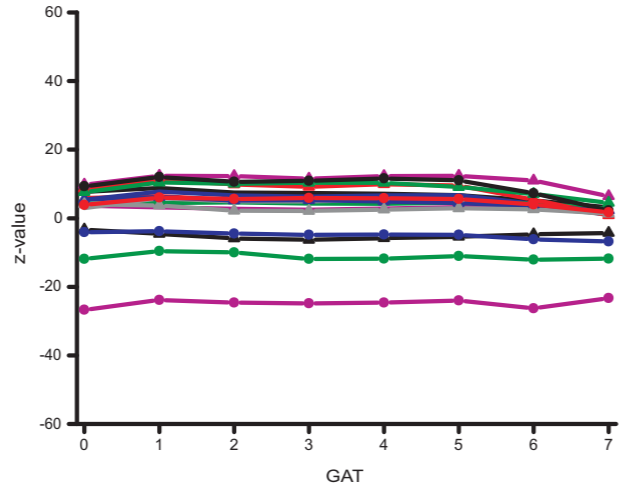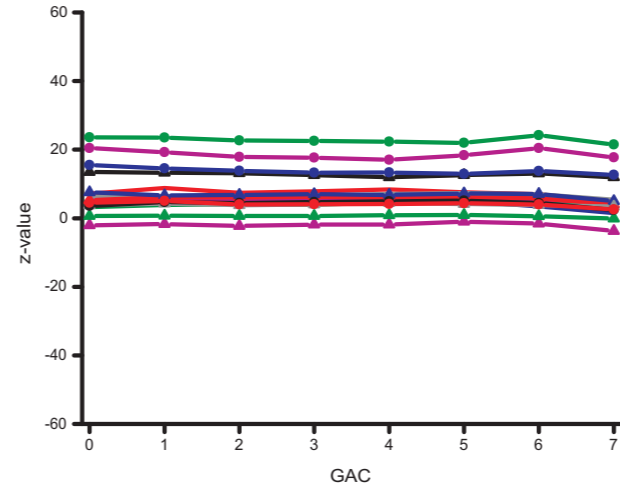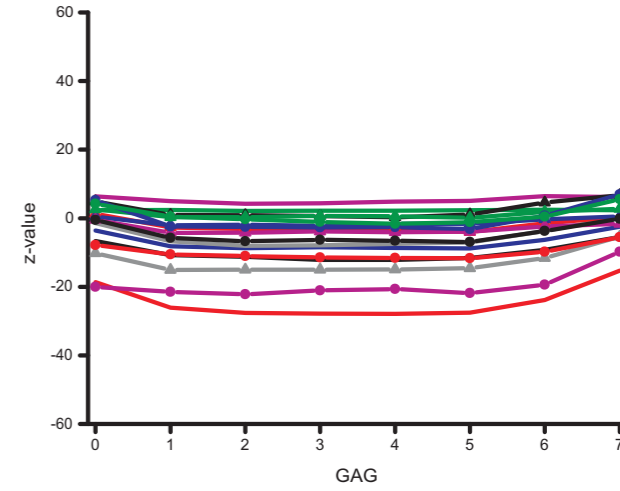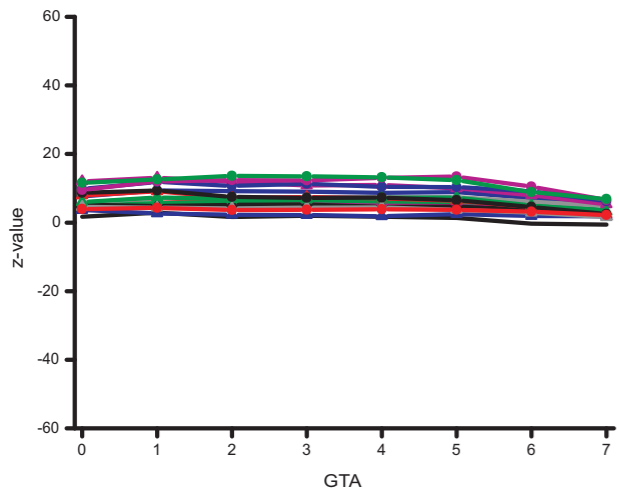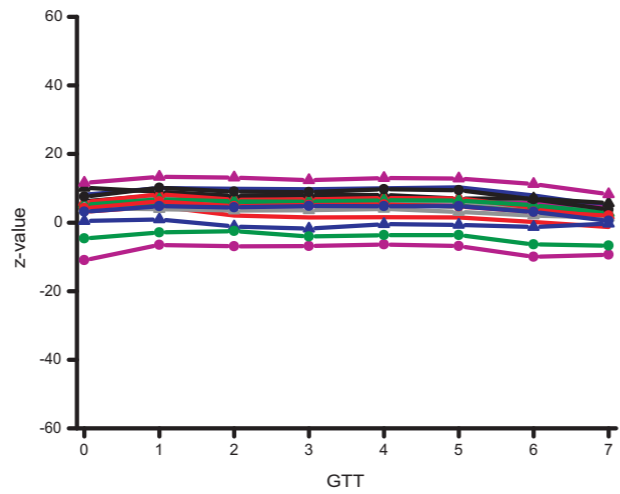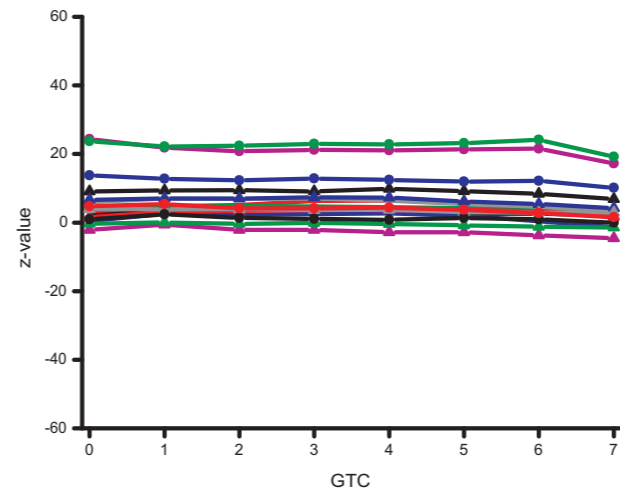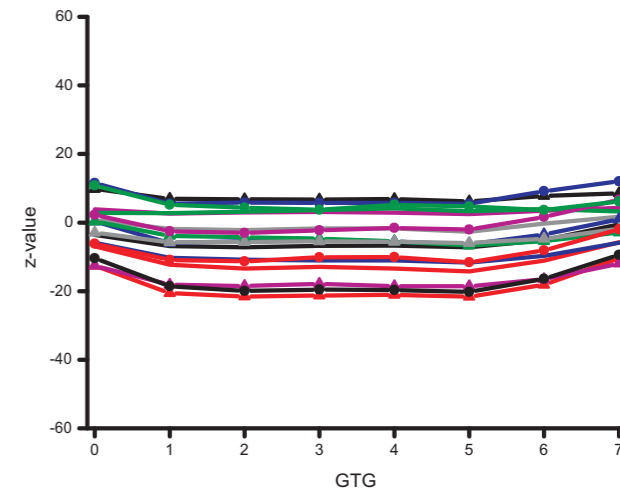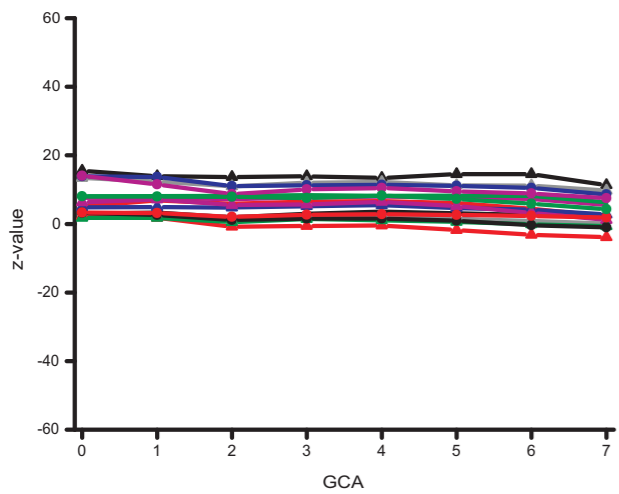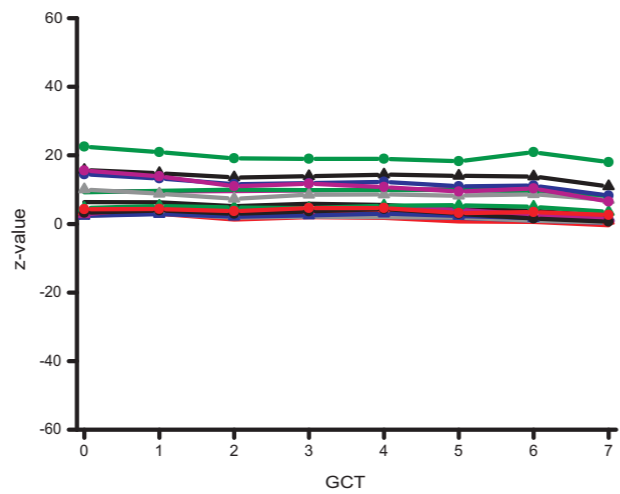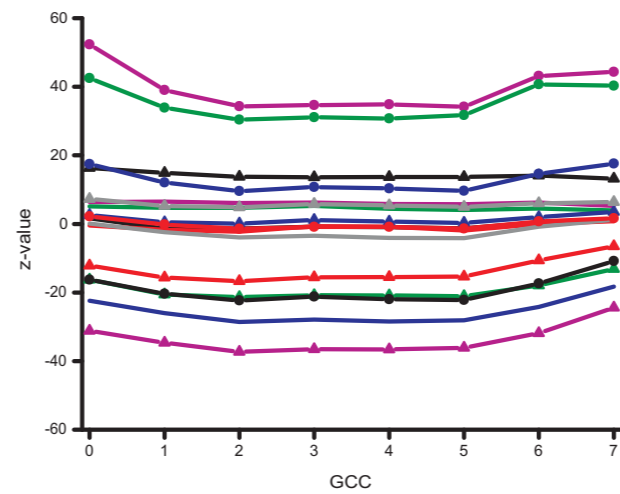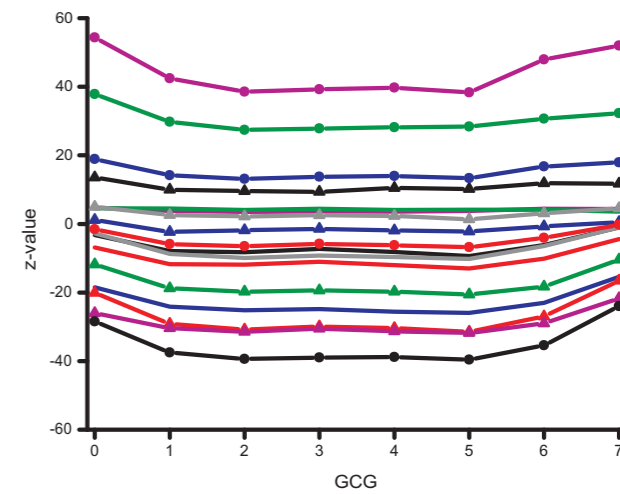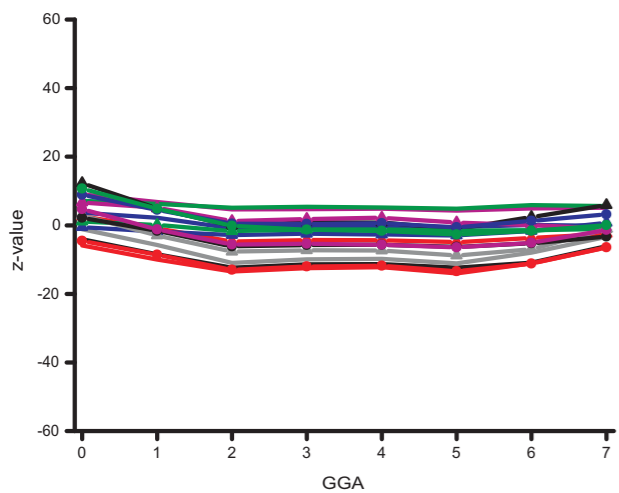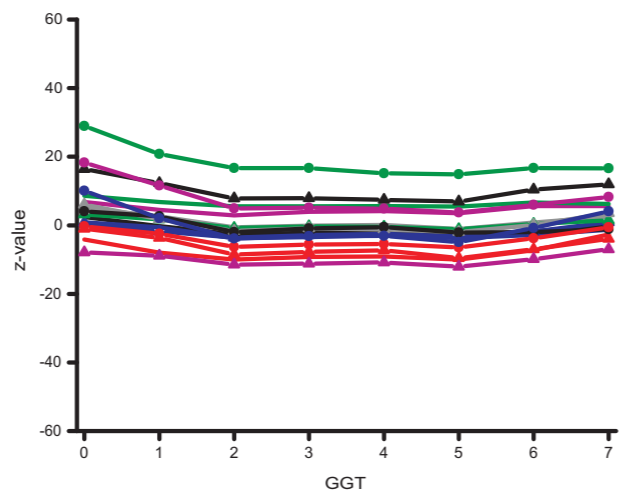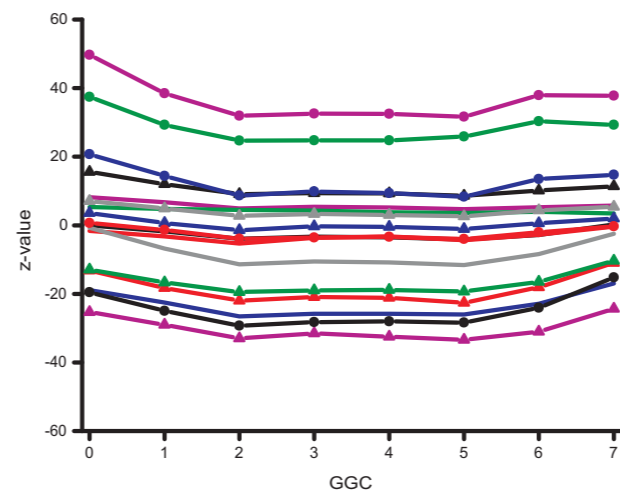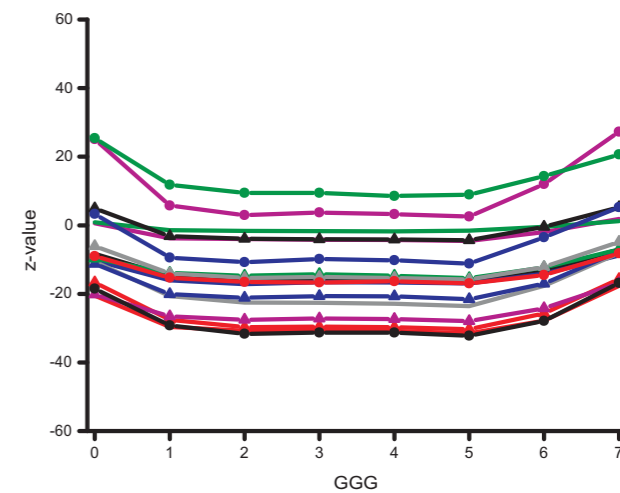

Supplement: nar_33_13_e115__1.pdf [file nar_33_13_e115__1.pdf]
